# Supplementary material
Source: PubMed Central journal article supplement (PMC3741671)
Supplement: NIHMS486554-supplement-supplement_1.pdf [file NIHMS486554-supplement-supplement_1.pdf]

Table S1

*Demographic, Clinical, and Medication Characteristics Among Patients Treated with Cognitive Enhancement Therapy or Enriched Supportive Therapy.*

| Variable                                        | CET      |           | EST      |           | <i>p</i> <sup>a</sup> |
|-------------------------------------------------|----------|-----------|----------|-----------|-----------------------|
|                                                 | (N = 30) |           | (N = 23) |           |                       |
|                                                 | <i>M</i> | <i>SD</i> | <i>M</i> | <i>SD</i> |                       |
| <b>Demographics</b>                             |          |           |          |           |                       |
| Age                                             | 25.99    | 6.54      | 26.42    | 6.60      | .812                  |
| Male (N / %)                                    | 19       | 63%       | 16       | 70%       | .855                  |
| Caucasian (N / %)                               | 20       | 67%       | 16       | 70%       | .656                  |
| Attended College (N / %)                        | 22       | 73%       | 17       | 74%       | .790                  |
| Not Employed (N / %)                            | 22       | 73%       | 16       | 70%       | .995                  |
| Schizophrenia (N / %)                           | 20       | 67%       | 15       | 65%       | .855                  |
| Years Since First Psychotic Symptom             | 3.17     | 2.32      | 3.28     | 2.08      | .854                  |
| IQ                                              | 97.90    | 7.74      | 98.83    | 10.24     | .709                  |
| <b>Symptoms</b>                                 |          |           |          |           |                       |
| BPRS Total                                      | 39.47    | 9.21      | 40.09    | 11.03     | .824                  |
| Wing Negative Symptoms Scale                    | 18.30    | 4.19      | 18.65    | 3.32      | .742                  |
| Raskin Depression Scale                         | 6.60     | 2.63      | 6.35     | 2.01      | .705                  |
| Covi Anxiety Scale                              | 5.67     | 1.88      | 6.13     | 2.22      | .415                  |
| <b>Treatment Exposure/Adherence<sup>b</sup></b> |          |           |          |           |                       |
| Total Hours of Treatment                        | 162.27   | 43.40     | 46.04    | 18.78     | < .001                |
| % Sessions Missed                               | 11.29    | 6.97      | 15.54    | 15.85     | .233                  |
| <b>Medications</b>                              |          |           |          |           |                       |
| Dose (baseline, cpz)                            | 412.22   | 343.58    | 417.61   | 309.85    | .953                  |
| Dose (year 1, cpz)                              | 402.33   | 332.93    | 482.78   | 345.16    | .426                  |
| Dose (year 2, cpz)                              | 473.58   | 384.43    | 514.30   | 396.01    | .735                  |
| Using Atypical Agent (baseline, N / %)          | 30       | 100%      | 22       | 96%       | .893                  |
| Using Atypical Agent (year 1, N / %)            | 25       | 100%      | 21       | 100%      | .555                  |
| Using Atypical Agent (year 2, N / %)            | 24       | 100%      | 19       | 100%      | .446                  |
| Compliant (baseline, N / %)                     | 27       | 90%       | 20       | 87%       | .928                  |
| Compliant (year 1, N / %)                       | 25       | 100%      | 17       | 81%       | .079                  |
| Compliant (year 2, N / %)                       | 22       | 92%       | 16       | 84%       | .781                  |

*Note.* CET = Cognitive Enhancement Therapy, BPRS = Brief Psychiatric Rating Scale, EST = Enriched Supportive Therapy.

<sup>a</sup> $\chi^2$  test or independent *t*-test, two-tailed, for significant differences between CET and EST participants.

Table S2

*Voxel-Based Morphometric Analyses of Gray Matter Density Change in a Two-Year Trial of Cognitive Enhancement Therapy or Enriched Supportive Therapy Restricted to Only Cases With Follow-up Data (N = 44).*

| MNI Coordinates<br>(x, y, z) | Cluster Size | Location                                                          | BA       | z    | p      | Direction           |
|------------------------------|--------------|-------------------------------------------------------------------|----------|------|--------|---------------------|
| Main Effect of Time          |              |                                                                   |          |      |        |                     |
| -4, -66, -12                 | 2925         | Bilateral cerebellum, left culmen                                 | NA       | 5.67 | < .001 | Loss                |
| -2, -32, 34                  | 547          | Left medial and posterior cingulate                               | 23/31    | 3.83 | < .001 | Loss                |
| Treatment x Time Interaction |              |                                                                   |          |      |        |                     |
| -26, -42, -6                 | 805          | Left parahippocampal gyrus, left fusiform gyrus, left hippocampus | 35/36/37 | 4.90 | < .001 | EST loss > CET loss |
| -14, -2, -24                 | 471          | Left parahippocampal gyrus, left amygdala                         | 28/34/38 | 3.49 | < .001 | EST loss > CET loss |
| 8, 40, 16                    | 348          | Bilateral anterior cingulate                                      | 9/10/32  | 3.47 | < .001 | EST loss > CET loss |
| 46, 0, -6                    | 267          | Right insula                                                      | 22/38    | 3.56 | < .001 | EST loss > CET loss |

*Note.* BA = Brodmann's Area, CET = Cognitive Enhancement Therapy, EST = Enriched Supportive Therapy

Table S3

*Changes in Gray Matter Volume During Two Years of Cognitive Enhancement Therapy or Enriched Supportive Therapy Restricted to Only Cases With Follow-up Data.*

| Site/Cluster              | CET (N = 25)   |                |                 | EST (N = 19)   |                |                | Between-Group Effect |      |                |
|---------------------------|----------------|----------------|-----------------|----------------|----------------|----------------|----------------------|------|----------------|
|                           | Baseline       | Year 1         | Year 2          | Baseline       | Year 1         | Year 2         | t                    | p    | p <sup>a</sup> |
|                           | M (SD)         | M (SD)         | M (SD)          | M (SD)         | M (SD)         | M (SD)         |                      |      |                |
| <b>Frontal</b>            |                |                |                 |                |                |                |                      |      |                |
| Anterior Cingulate (L)    | 5.84<br>(.81)  | 5.87<br>(.82)  | 5.90<br>(.88)   | 6.02<br>(1.07) | 5.97<br>(1.17) | 5.92<br>(.89)  | 1.23                 | .223 | .223           |
| Anterior Cingulate (R)    | 5.11<br>(.70)  | 5.07<br>(.71)  | 5.03<br>(.74)   | 5.28<br>(.93)  | 5.16<br>(1.00) | 5.03<br>(.74)  | 1.73                 | .088 | .176           |
| <b>Medial temporal</b>    |                |                |                 |                |                |                |                      |      |                |
| Amygdala (L)              | 1.06<br>(.13)  | 1.08<br>(.11)  | 1.09<br>(.12)   | 1.05<br>(.15)  | 1.05<br>(.15)  | 1.04<br>(.12)  | 2.35                 | .022 | .039           |
| Fusiform Gyrus (L)        | 9.87<br>(1.03) | 9.95<br>(1.00) | 10.03<br>(1.08) | 9.89<br>(1.49) | 9.82<br>(1.37) | 9.74<br>(1.18) | 2.25                 | .028 | .039           |
| Hippocampus (L)           | 3.98<br>(.34)  | 3.98<br>(.33)  | 3.99<br>(.35)   | 4.04<br>(.50)  | 3.98<br>(.50)  | 3.92<br>(.46)  | 2.31                 | .024 | .039           |
| ParaHippocampal Gyrus (L) | 3.83<br>(.39)  | 3.85<br>(.38)  | 3.87<br>(.43)   | 3.81<br>(.52)  | 3.78<br>(.49)  | 3.74<br>(.36)  | 2.10                 | .039 | .039           |
| <b>Temporal</b>           |                |                |                 |                |                |                |                      |      |                |
| Insula (R)                | 7.81<br>(.90)  | 7.88<br>(.93)  | 7.96<br>(.99)   | 7.65<br>(1.19) | 7.60<br>(1.30) | 7.55<br>(.94)  | 1.82                 | .074 | -              |

*Note.* All volumetric data are presented in cubic centimeters.

CET = Cognitive Enhancement Therapy, EST = Enriched Supportive Therapy

<sup>a</sup>p-values are adjusted for multiple inference testing within each cluster of results using Hochberg's correction
